# Supplementary material
Source: PubMed Central journal article supplement (PMC3408748)
Supplement: JCI63539sd.pdf [file JCI63539sd.pdf]

## **SUPPLEMENTAL DATA**

### **SUPPLEMENTAL METHODS**

#### **1. Primers used for the generation of miR-122 targeting vectors and Southern blot probes:**

miR122-5'armF: 5'GCCTAAAACAGCCAAATGGA

miR122-5'armR: 5'CACCCACTCTCACCTCGTCA

miR122-3'armF: 5'TTGACACTGCCTCTGTGGAG

miR122-3'armR: 5'TGGCTTCAACTTCCCATCAG

miR122-geneF: 5'cgatccTCTTCCTGGAATTCAAGCCTTT

miR122-geneR: 5'cgatccAGTGGGCCTAGTGCTGGAAA

mir122a-5'-ProbeF: 5'TAGAGAGGGGAAGGGGAAGG

mir122a-5'-ProbeR: 5'GGAAACCCATTTAGAAAGGGAGA

miR122 3' Probe F : 5'ACCCCACTCCTTAGCATCATC

miR122 3' Probe R : 5'GCTCTTGGCTCCCTGTTTATGC

#### **2. E2A-Cre genotyping primers**

Cre1F: 5'CCTGTTTTGCACGTTACCG

Cre1R: 5'ATG CTTCTGTCCGTTTGCCG

#### **4. Alb-Cre genotyping primers**

CreF: 5'GCGGTCTGGCAGTAAAACTATC

CreR: 5'GTGAAACAGCATTGCTGTCACTT

#### **5. qRT-PCR primers**

Afp RTF: TCACATCCACGAGGAGTGTTGC

Afp RTR: CCTTCAGGTTTGACGCCATTC

Adam-10 RTF: GCTGGGAGGTCAGTATGGAAATC

Adam-10 RTR: TGGCACGCTGGTGTTTTTGG

Slc7a1 RTF: CACCACAGGGGAAGAAGTCAAG

Slc7a1 RTR: CGATGTCCAGGCAGAAGTAAGG

AldoA RTF: TCCATTGGCACCGAGAACAC  
AldoA RTR: TTGATAACTTGGGGGAAGGGAC  
Ccl2 RTF: TCTGTGCTGACCCCAAGAAGG  
Ccl2 RTR: TGGTTGTGGAAAAGGTAGTGGAT  
Ccl2 hnRNA-RTF: TCTCAACAGCATTGTCTCTATGGC  
Ccl2 hnRNA-RTR: CATTCTTCTTGGGGTCAGCAC  
RhoA-RTF: TCTATGTGCCACGGTGTTTG  
RhoA-RTR: CATCGGTGTCTGGATAAGAGAGAGG  
Epcam-RTF: GATGAAAAGGCACCCGAGTTC  
Epcam-RTR: TAACCAGGACAACAATCCCCGC  
Ucp2 RT-F: CAGCCAGCGCCAGTACCG  
Ucp2 RT-R: GCCAGGGCACCTGTGGTGCT  
Srebf1-RT-F: TGGTGGGCACTGAAGCAAAG  
Srebf1-RT-R: AAAGACAAGGGGCTACTCTGGGAG  
Hmgcr-RT-F: TCTTGACGCTCTTGTGGAATGC  
Hmgcr-RT-R: AAAGTCTGGCAAATGGCTGAG  
Acly-RT-F: GGAGTCAAATCCTGGCTAAACCTC  
Acly-RT-R: TTTCGTCCACACCCACAAGCAG  
Chrebp-RT-F: TGAACAACGCCATCTGGAGAG  
Chrebp-RT-R: AATCCCCTTCCCTGCTGGACTTAC  
Fatp1-RTF: ATCCGTCTGGTCAAGGTCAATG  
Fatp1-RTR: TGGTGGCACTGTCACTAACATAACC  
Mogat1 RT-F: CAGAGCAAGGAGGCAGAAGATG  
Mogat1 RT-R: GAACAACGGGAAACAGAACCAG  
Agpat3 RT-F: GTTATCCTCAACCACAACCTTCG  
Agpat3 RT-R: TTCCTCCCCTTCCGTTTGC  
Agpat9 RT-F: TGGAGGATGAAGTGACCCAGAG  
Agpat9 RT-R: AGAGGTAGCAGGAAGCAATAGCG  
Dgat1 RT-F: GCCACAATCATCTGCTTCCCAG  
Dgat1 RT-R: CCACTGACCTTCTTCCCTGTAGAG  
Ppap2a RT-F: CCTTTGTCTGGCAATCCCTACATAG

Ppap2a RT-R: CCTCCTTGACTTTCTCTTCATTCCC  
Ppap2c RT-F: CTCATTGGGAGAAGCCTACC  
Ppap2c RT-R: GCACATAGCCAGAACAGTTGAC  
Agpat1-RT-F: TGCTTGAATGATGGAGGTCC  
Agpat1-RT-R: CCTTCAGGAAAAACCCAGACTCTC  
Cidec-RT-F: GATGGCACAATCGTGGAGACAG  
Cidec-RT-R: TCTTAGTTGGCTTCTGGGAAAGG  
Ehhadh RT-F: ACAGCGATACCAGAAGCCAGTG  
Ehhadh RT-R: AGCAACAGGAACTCCAACGACC  
Acsl4 RT-F: GCCAGAAAACCTTGAGCGTTCCTC  
Acsl4 RT-R: GTAAGGGGTGAAGAGTATCCAATCC  
Scd1 RT-F: ATTCACGACCCCACCTATCAGG  
Scd1 RT-R: TAGTAGAAAATCCCGAAGAGGCAG  
Mapkapk2 RT-F: CATCACCGACGACTACAAGGTCAC  
Mapkapk2 RT-R: GACAATCAGCAGGCACTTCCTC  
Gadd45b RT-F: GACATTGGGCACAACCGAAG  
Gadd45b RT-R: TTTGGAGTGGGTCTCAGCGTTC  
H19-RT-F: TGTATGCCCTAACCGCTCAGTC  
H19 RT-R: ATTCATTCTGCCCCGCCTGC  
H19-hnRNA RTF: TAAGTGTCTGTCCCGCTCGTG  
H19-hnRNA RTR: GGAGTATGCTCACCAAGAAGGCTG  
Igf2 RT-F: CCTGGAGACATACTGTGCCACC  
Igf2 RT-R: TTGGAAGAACTTGCCCACGG  
Igf2-hnRNA RT-F: GGTAGTTCCTTCTTCAGCCTTCCC  
Igf2-hnRNA RT-R: ATTCCTTCAACCCCACCTCG  
C-Jun RT-F: TGGGCACATCACCACCTACACC  
C-Jun RT-R: GGTTGAAGTTGCTGAGGTTGGC  
Ctnnb1 RT-F: GCTGGTGAAAATGCTTGGGTC  
Ctnnb1 RT-R: GCTTGCTCTCTTGATTGCCATAAG  
Ccng1 RT-F: CTCAGTTCTTTGGCTTTGACACG  
Ccng1 RT-R: ACATTCCTTTCCTCTTCAGTCGC

Ccnd1 RT-F: GAGCAGAAGTGCGAAGAGGAGG  
Ccnd1 RT-R: TCACCAGAAGCAGTTCCATTTGC  
Mapre1 RT-F: TGATTTGCCAGGAGAACG  
Mapre1 RT-R: GCCCCCTTCATCAGGTATCA  
c-Myc RT-F: AGGCTGGATTTCTTTGGGC  
c-Myc RT-R: TCGCTCTGCTGTTGCTGGTGATAG  
Gapdh-RT-F: TCCTGCACCACCAACTGCTTAG  
Gapdh-RT-R: TGCTTCACCACCTTCTTGATGTC  
18S RT-F: TGACGGAAGGGCACCACCAG  
18S RT-R: TCGCTCCACCAACTAAGAACGGC

**6. Amplification and cloning of 3'-UTRs to psiCHECK2 (Promega) was performed as described (1). The following primers were used.**

Agpat1-3'UTR- XhoI-F: ccgctcgagACAGAAGGGCTGACACCAGATGAC  
Agpat1-3'UTR-NotI-R: aagaatgcgccgcAACGCCACTGGGAGGAAATG  
Agpat1-3'UTRmut1-F: CTTCTGAAGTGAATGTCAGAGGATGTTCTTTCCCTGCCCC  
Agpat1-3'UTRmut1-R: GGGGCAGGGAAAGAACATCCTCTGACATTCACCTCAGAAG  
Agpat1-3'UTRmut2-F: GTGGGTGCAGTCTCCAGAGGAAGCCCCACCTGCCATC  
Agpat1-3'UTRmut2-R: GATGGCAGGTGGGGCTTCTCTGGAGACTGCACCCAC  
Agpat1-3'UTRmut2-F: GAAGCTGCACCTGACAGAGGTCACAGGCTCACCTG  
Agpat1-3'UTRmut2-R: CAGGTGAGCCTGTGACCTCTGTCAGGTGCAGCTTC  
Cidec-3'UTR-XhoI-F: ccgctcgagTACATGCAGCAGTTCCTGGATGCC  
Cidec-3'UTR-NotI-R: aagaatgcgccgcCAGAATCATCTGCATTCCCTAAGG  
Cidec-3'UTRmut1-F: CGTCTTCCGTGCCTGAGGCTCTCTGGTGCAC  
Cidec-3'UTRmut1-R: GTGCACCAGAGAGCCTCAGGCACGGAAGACG  
Cidec-3'UTRmut2-F: GGTCCTGGCTGCCCAGTGAGATCATGCAGTAGAC  
Cidec-3'UTRmut2-R: GTCTACTGCATGATCTCACTGGGCAGCCAGGACC  
Mapre1-3'UTR-XhoI-F: ccgctcgagAGCAGAGCAACATCCGAAG  
Mapre1-3'UTR-NotI-R: aagaatgcgccgcTGACAATGGGGAGCAGTGAC  
Mapre1-3'UTR-del-XhoI-F: ccgctcgagCAGAAGTCTCACCTTTTCCG  
Ccl2-3'UTR-XhoI-F: ccgctcgagTGTGACTCGGACTGTGATGC

Ccl2-3'UTR-NotI-R: aagaatgcggccgcGGAATCTCAAACACAAAGTTTACCC  
Ccl2-3'UTRmut-F: CTGTGAATCCAGATTCAAGTGAATCAATGTATGAGAGATG  
Ccl2-3'UTRmut-R: CATCTCTCATACATTGATTCACTTGAATCTGGATTACAG

#### **7. Primers used for cloning miR-122 into scAAV.EF1 $\alpha$ .eGFP**

miR-122-FseI-F: ATCGATGGCCGGCCTGACAAGGTTCCCCTATTATCA  
miR-122-FseI-R: ATCGATGGCCGGCCGTAAGTACACAAGATTGAGAAGACTGA

#### **8. Sequence of short hairpin RNA targeting luciferase in a miR-30 backbone used for construction of scAAV.shLuc.eGFP**

GGCCGGCCCGTTGCCTGCACATCTTGGAAACACTTGCTGGGATTACTTCTTCAGGTT  
AACCCAACAGAAGGCTCGAGAAGGTATATTGCTGTTGACAGTGAGCGCC**CGCCTGAA**  
**GTCTCTGATTAATAGTGAAGCCACAGATGTATTAATCAGAGACTTCAGGCGGTTGC**  
CTACTGCCTCGGAATTCAAGGGGCTACTTTAGGAGCAATTATCTTGTTTACTAAACT  
GAATACCTTGCTATCTCTTTGATACATTGGCCGGCC

(shRNA sequence in bold)

**Plasmid construction:** Coding regions and/or 3' UTRs were PCR amplified from 129/SvJ genomic DNA and subsequently cloned into the multiple cloning sites of psiCHECK2 (Promega), a reporter vector expressing both renilla and firefly luciferase.

#### **Antibodies used in western blot analysis:**

Agpat1 (Santa Cruz, sc-68592), Agpat3 (Santa Cruz, sc-83190), Agpat9 (Santa Cruz, sc68372), Ccnd1 (Santa Cruz, sc-7865), Afp (Santa Cruz, sc-8108), Adam10 (Santa Cruz, sc-28358), Dgat1 (Santa Cruz, sc-32861), Ppap-2a (Santa Cruz, sc-51390), EpCAM (Santa Cruz, sc-66020), c-Jun (Santa Cruz, sc-44), Mapre1 (Santa Cruz, sc-15347), Iqgap1 (Santa Cruz, sc-10792), RhoA (67B9) (Cell Signaling, 2117), Cidec (GenWay, GWB-269046), Igf2 (Abcam, ab9574), c-Myc (Santa Cruz, sc-40), Smarcd1/Baf60a (Santa Cruz, sc-135843),  $\beta$ -catenin (Abcam, ab6302), Mogat1 (Mgat1) (Santa Cruz, sc-32387), Cyp2e1 (Abcam, ab28146), Srf (sc-335), Igf1ra (sc-712), Histone H3 (Abcam, ab1791), HNF6 (Santa Cruz, sc-13050) and Gapdh (Chemicon, MAB374).

### **MicroRNA mimics and inhibitors**

miRIDIAN mimic mmu-miR-122 (cat # C-310464) and negative control RNA (cat # CN-001000) (Figs. 5F-I, S8 and S10), miRIDIAN Hairpin Inhibitor mmu-miR-122 (IH-310464) and control inhibitor (cat # IN-001005) (Figs. S8 and S10) were obtained from Thermo scientific. LNA-modified anti-miR-122 (cat # 199002) and control (cat # 410039) (Figures 5H, I) were obtained from Exiqon.

**Generation of liver specific (LKO) and germ-line miR-122 knockout (KO) mice.** The targeting vector was constructed by amplifying homology arms from 129SvJ genomic DNA and cloning them into pBlueScript SK (pBSK) (Stratagene). *mmu-miR-122* gene with the flanking region (569bp) was PCR amplified and cloned into pFlox-Frt-Neo (2). Floxed *mmu-miR-122*-neo was subcloned into pBSK flanked by 5'- and 3'-arms (**Figure S1**). Electroporation of mouse R1ES cells, provided by Dr. Andras Nagy (3), and subsequent generation of chimeric mice from targeted clones were performed at the University of Michigan Knockout Mouse Core Facility. Two of the mutant clones were transmitted through the mouse germ line, which was confirmed by analysis of tail DNA by PCR. *miR-122<sup>loxP/loxP</sup>* littermates served as controls in all studies. Animals were housed in a helicobacter-free facility and were handled and euthanized following institutional guidelines.

**Measurement of hepatic triglyceride synthesis.** The *in vivo* triglyceride synthesis rate was determined by measuring <sup>3</sup>H<sub>1</sub>-glycerol incorporation into hepatic triglycerides following a published protocol (4, 5). Briefly, 8-10 week-old mice were trained to feed during 3h periods from 9 A.M. to 12 noon every day for two weeks. On the day of the experiment,

after a 3 hour feeding and subsequent 1h fasting,  $^3\text{H}_1$  glycerol (50 $\mu\text{Ci}/150\mu\text{l}$ ) was injected IP. Twenty minutes later, mice were sacrificed and livers were harvested. Total lipid was extracted from 0.3g of liver tissue and separated on a TLC plate. Triglyceride spots were scraped from the plate, suspended in the scintillation cocktail and counted in a scintillation counter. The tritium incorporated into hepatic triglycerides was normalized to serum  $^3\text{H}_1$  level in each mouse.

**Determination of Triglyceride synthesis in primary mouse hepatocytes transfected with siRNA.** Primary hepatocytes were isolated from LKO or KO mice with collagenase-based method as previously described (6). The cell viability over 85% was determined by trypan blue staining before seeded onto 12 well plates at  $5 \times 10^5$  cells per well in culture medium (Williams' Medium E with 10% FBS, 10mM HEPES and 10 nm insulin plus penicillin and streptomycin) and cultured overnight. The hepatocytes were transfected with a mixture of 50nmol/L gene-specific siRNA or scrambled si-RNA (Smartpool si-Genome from Dharmacon) and 2 $\mu\text{l}/\text{ml}$  lipofectamine 2000 (Invitrogen) in culture medium without antibiotics. After 6 hours of incubation, the mixture was replaced with culture medium. After 48h the culture medium was replaced with 10 $\mu\text{Ci}/\text{ml}$  [ $^3\text{H}_1$ ]-glycerol in FBS free culture medium containing 5% fatty acid free BSA and 0.3mM oleic acid. TG synthesis in transfected mouse hepatocytes was determined by extracting lipids and separating TG on TLC plates followed by counting  $^3\text{H}_1$  incorporation in TG in a scintillation counter.

**Microarray analysis.** Total RNA from the livers of male mice fasted overnight was isolated using Trizol (Invitrogen), purified using mini RNeasy columns (Qiagen), and the

integrity and quantity of the RNA was assessed using an Agilent Bioanalyzer and Nanodrop RNA 6000, respectively. Total RNA was labeled using the Affymetrix Whole Transcript Sense Labeling kit and hybridized to the Affymetrix Mouse Exon 1.0 ST array following the manufacturer's protocol at the Microarray Shared Resource Facility, The Ohio State University Comprehensive Cancer Center.

Affymetrix GeneChip Mouse Exon 1.0 ST Array with 23,332 probe-sets was used for gene expression profiling of 5 control (miR-122<sup>loxP/loxP</sup>) and 5 LKO mice. Signal intensities were quantified by Affymetrix software. Background correction and normalization was performed and gene expression level was summarized over probes using the RMA method (7). A filtering method based on the percentage of samples with expression values below the noise level was applied to filter out probe-sets with little or no expression, resulting in 11,670 detectable probe-sets. Generalized linear models were used to detect differentially expressed genes between the control (floxed) and LKO mice. In order to improve the estimates of variability and statistical tests for differential expression, a variance smoothing method was employed (8). The significance level was determined by controlling the average number of false positives (9). A p-value of 0.0001 was used as the significance cutoff, allowing an average number of false positives of 1.2.

**Microarray analysis of the tumor RNA.** The Agilent 4X44 platform was used to assess gene expression in liver tumors from 4 LKO and 4 KO mice and in normal liver from age-matched control mice using manufacturer's protocol. Briefly, highly purified total RNA from each group was hybridized to microarray slides overnight, washed, and then scanned with



an Agilent G2505C Microarray Scanner. The raw signal intensity for each probe was extracted from the image data using Agilent Feature Extraction 10.5 (FE) and analyzed by the mathematical software package “R”. The log<sub>2</sub> intensity ratio of red to green was normalized to the sum of log<sub>2</sub> intensities of red and green. This normalization adjusts the red and green intensities relative to one another so that the red/green ratios are an unbiased representation of true ratios.

**Ingenuity Pathway Analysis:** The IPA application

(<http://www.ingenuity.com/products/IPA/Free-Trial-Software.html>) was used to identify gene networks that were overrepresented among the genes that exhibited  $\geq 1.5$  fold up- or down-regulation with a *P*-value  $\leq 0.0001$  in LKO livers. A significance score of  $\geq 3$  indicates that there is a less than 1 in 1000 chance that the highlighted genes were assembled into a network due to a random chance.

## SUPPLEMENTAL TABLES

**Table S1. Serum profiles of 5 week old control and miR-122 KO mice**

|                    | ALP (U/L)        | ALT (U/L)   | Chl<br>(mg/dL) | HDL-Chl<br>(mg/dL) | TG<br>(mg/dL)   |
|--------------------|------------------|-------------|----------------|--------------------|-----------------|
| <b>Control</b>     |                  |             |                |                    |                 |
| (n=7)              | 262.9 ± 51.5     | 42.5 ± 15.3 | 130.2 ± 70.7   | 47.4 ± 27.7        | 194 ± 101.5     |
| <b>Median ± SE</b> |                  |             |                |                    |                 |
| <b>KO</b>          |                  |             |                |                    |                 |
| (n=8)              | 615.1 ± 69.2     | 44.2 ± 13.7 | 61.8 ± 25.0    | 21.6 ± 10.0        | 156.2 ±<br>74.7 |
| <b>Median ± SE</b> |                  |             |                |                    |                 |
| <b>P-value</b>     | <b>5.82E-07*</b> | 0.812       | <b>0.033*</b>  | <b>0.039*</b>      | 0.421           |

Serum was collected from mice by cardiac puncture after overnight fasting. Control mice included 4 male and 3 female. KO mice included 4 male and 4 female. Statistical significance was determined by student's 2-tailed t test. *P*-value<0.05 indicated by asterisks.

**Table S2. Networks identified by Ingenuity Pathway Analysis among dysregulated genes in livers of miR-122 LKO mice.**

| <b>#</b> | <b>IPA Score</b> | <b>Network functions</b>                                                         |
|----------|------------------|----------------------------------------------------------------------------------|
| <b>1</b> | <b>33</b>        | <b>Organismal Survival, Cellular Movement, Cellular Growth and Proliferation</b> |
| <b>2</b> | <b>18</b>        | <b>Lipid Metabolism, Small Molecule Biochemistry, Nucleic Acid Metabolism</b>    |
| <b>3</b> | <b>16</b>        | <b>Lipid Metabolism, Small Molecule Biochemistry, Molecular Transport</b>        |
| <b>4</b> | <b>15</b>        | <b>Amino Acid Metabolism, Molecular Transport, Small Molecule Biochemistry</b>   |
| <b>5</b> | <b>15</b>        | <b>Organismal Development, Hematological Disease, Immunological Disease</b>      |
| <b>6</b> | <b>13</b>        | <b>Lipid Metabolism, Molecular Transport, Small Molecule Biochemistry</b>        |
| <b>7</b> | <b>13</b>        | <b>Cell Death, Gene Expression, Cancer</b>                                       |

The IPA application (<http://www.ingenuity.com/products/IPA/Free-Trial-Software.html>) was used to identify gene networks that were overrepresented among the genes that exhibited  $\geq 1.5$  fold up- or down-regulation with a  $P$ -value  $\leq 0.0001$  in LKO livers. A significance score of  $\geq 3$  indicates that there is a less than 1 in 1000 chance that the highlighted genes were assembled into a network due to a random chance.

**Table S3. Genes involved in lipid metabolism that are dysregulated in the livers of miR-122 LKO mice.**

| Pathway                   | Gene               | qPCR<br>(LKO/control) | <i>P</i> -value | Microarray<br>(LKO/control) | <i>P</i> -value |
|---------------------------|--------------------|-----------------------|-----------------|-----------------------------|-----------------|
| Triglyceride<br>synthesis | Agpat1             | 10.8                  | 2.5E-07         | 4.72                        | 3.15E-12        |
|                           | Agpat3             | 2.2                   | 0.015           | 1.25                        | 0.002           |
|                           | Agpat9             | 2.0                   | 0.007           | 1.22                        | 0.037           |
|                           | Mogat1             | 14.5                  | 0.000           | 3.23                        | 0.000           |
|                           | Dgat1              | 2.1                   | 0.036           | 1.2                         | 0.004           |
|                           | Ppap2a             | 2.0                   | 0.022           | 1.3                         | 0.001           |
|                           | Ppap2c             | 1.6                   | 0.011           | 1.3                         | 0.034           |
| Fatty acid<br>synthesis   | Acly               | 0.62                  | 0.031           | 0.65                        | 1.93E-05        |
|                           | Chrebp             | 0.59                  | 0.000           | 0.58                        | 2.86E-07        |
|                           | Srebp1c            | 0.56                  | 0.010           | 0.58                        | 7.05E-05        |
|                           | Scd1               | 0.18                  | 0.050           | 0.28                        | 0.0002          |
|                           | Acs14              | 2.34                  | 0.010           | 1.91                        | 2.65E-05        |
| Fatty acid<br>oxidation   | Ehhadh             | 2.10                  | 0.002           | 2.32                        | 1.38E-05        |
|                           | Ucp2               | 4.92                  | 0.000           | 4.39                        | 1.00E-09        |
| Cholesterol<br>synthesis  | Hmgcr              | 0.69                  | 0.050           | 0.68                        | 0.000           |
| Lipid<br>transport        | Stard4             | 0.59                  | 0.014           | 0.69                        | 3.24E-06        |
|                           | (Stard2)           | 3.38                  | 0.05            | 1.78                        | 6.00E-05        |
|                           | Slc27a1<br>(FATP1) | 3.52                  | 0.008           | 2.19                        | 0.000           |
| Lipid<br>storage          | Cidec<br>(Fsp27)   | 10.42                 | 0.000           | 6.29                        | 1.99E-07        |

qPCR analyses were performed in triplicate. The primer sequences are provided in the supplemental methods. Relative expression was calculated using the  $\Delta\Delta C_T$  method (1). Statistical analysis of the qPCR data was performed using the student's t 2-tailed test.

**Table S4. Genes related to hepatocarcinogenesis are significantly upregulated in miR-122 LKO livers.**

| <b>Pathway</b> | <b>Gene</b>     | <b>qPCR<br/>(LKO/control)</b> | <b>P-value</b> | <b>Microarray<br/>(LKO/control)</b> | <b>P-value</b> |
|----------------|-----------------|-------------------------------|----------------|-------------------------------------|----------------|
| <b>Cancer</b>  | <b>H19</b>      | <b>493</b>                    | <b>0.000</b>   | <b>118.45</b>                       | <b>0.000</b>   |
|                | <b>Afp</b>      | <b>8.33</b>                   | <b>0.001</b>   | <b>1.72</b>                         | <b>0.001</b>   |
|                | <b>Igf2</b>     | <b>185</b>                    | <b>0.050</b>   | <b>4.41</b>                         | <b>0.000</b>   |
|                | <b>MapKapk2</b> | <b>1.73</b>                   | <b>0.020</b>   | <b>1.72</b>                         | <b>0.000</b>   |
|                | <b>Ctnnb1</b>   | <b>1.27</b>                   | <b>0.000</b>   | <b>1.71</b>                         | <b>0.000</b>   |
|                | <b>c-Jun</b>    | <b>1.9</b>                    | <b>0.000</b>   | <b>1.93</b>                         | <b>0.001</b>   |
|                | <b>Epcam</b>    | <b>2.58</b>                   | <b>0.003</b>   | <b>1.59</b>                         | <b>0.002</b>   |
|                | <b>Ccng1</b>    | <b>3.12</b>                   | <b>0.010</b>   | <b>2.27</b>                         | <b>0.000</b>   |
|                | <b>Ccnd1</b>    | <b>7.13</b>                   | <b>0.030</b>   | <b>3.54</b>                         | <b>0.000</b>   |
|                | <b>Gadd45B</b>  | <b>5.66</b>                   | <b>0.012</b>   | <b>2.30</b>                         | <b>0.000</b>   |
|                | <b>c-Myc</b>    | <b>1.60</b>                   | <b>0.035</b>   | <b>1.21</b>                         | <b>0.097</b>   |
|                | <b>RhoA</b>     | <b>1.60</b>                   | <b>0.010</b>   | <b>1.26</b>                         | <b>0.000</b>   |

qRT-PCR analyses were performed in triplicate. The primer sequences are provided in the supplemental methods. Relative expression was calculated using the  $\Delta\Delta C_T$  method (1). Statistical analysis of the qPCR data was performed using the student's t 2-tailed test.

**Table S5. Serum profiles of 6 month old control and miR-122 KO mice**

|                                               | <b>ALP (U/L)</b> | <b>ALT (U/L)</b> | <b>GGT (U/L)</b> |
|-----------------------------------------------|------------------|------------------|------------------|
| <b>Control</b><br>(n=7)<br><b>Median ± SE</b> | 81.0 ± 42.64     | 54.6 ± 18.2      | 0.67 ± 0.82      |
| <b>KO</b><br>(n=5)<br><b>Median ± SE</b>      | 252.3 ± 63.0     | 54.6 ± 18.2      | 4.2 ± 2.4        |
| <b>P-value</b>                                | <b>0.0002*</b>   | 0.10             | <b>0.007*</b>    |

Serum was collected from mice by cardiac puncture after overnight fasting. Control mice included 7 males and KO mice included 5 males. Statistical significance was determined by student's 2-tailed t test. *P*-value<0.05 indicated by asterisks.

## SUPPLEMENTAL FIGURE 1

**A**

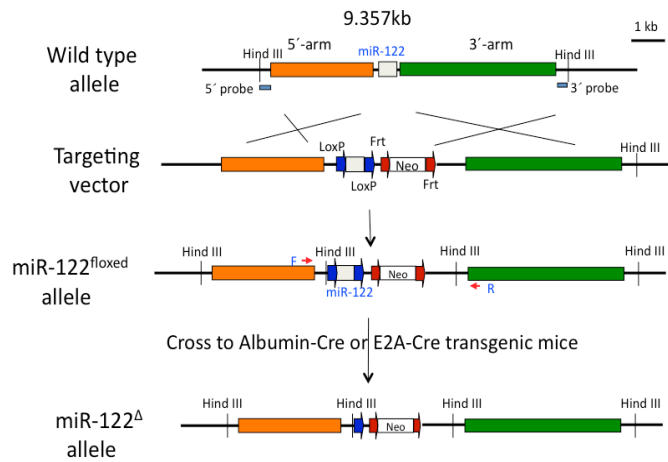

**B**

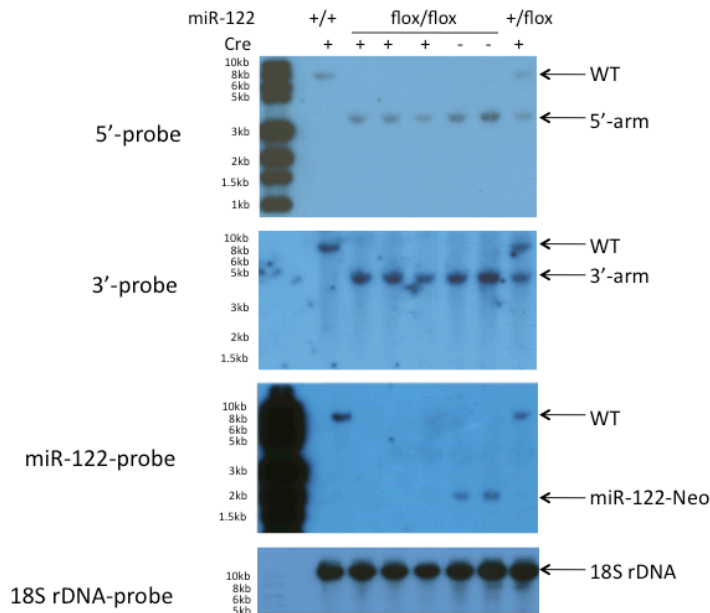

**Figure S1. (A) Schematic representation of the generation of conditional and germ-line miR-122 knockout mice.** The targeting vector was generated by amplifying homology arms from 129SvJ genomic DNA, which were cloned into pBSK. Targeted mouse ES cell clones and chimeric mice were generated at the University of Michigan Knockout Mouse Core Facility. Two independent targeted clones were transmitted through the mouse germ line. **(B) Southern blot analysis of liver DNA from 10 week-old mice of the indicated genotypes.** Hind III-digested liver DNA was subjected to Southern blot analysis with probes specific for 5'- and 3'- arms as well as the *miR-122* locus to confirm correct targeting and Cre-mediated recombination. The 5' probe recognizes a ~9.5 kb fragment from the WT allele and a ~3.3 kb fragment from *miR-122*<sup>loxP</sup> allele. The 3' probe recognizes a ~9.5 kb WT fragment and a ~4.6 kb *miR-122*<sup>loxP</sup> fragment. Cre-mediated deletion of *miR-122* was confirmed by loss of a ~1.8 kb fragment detected with the *miR-122* probe.

## SUPPLEMENTAL FIGURE 2

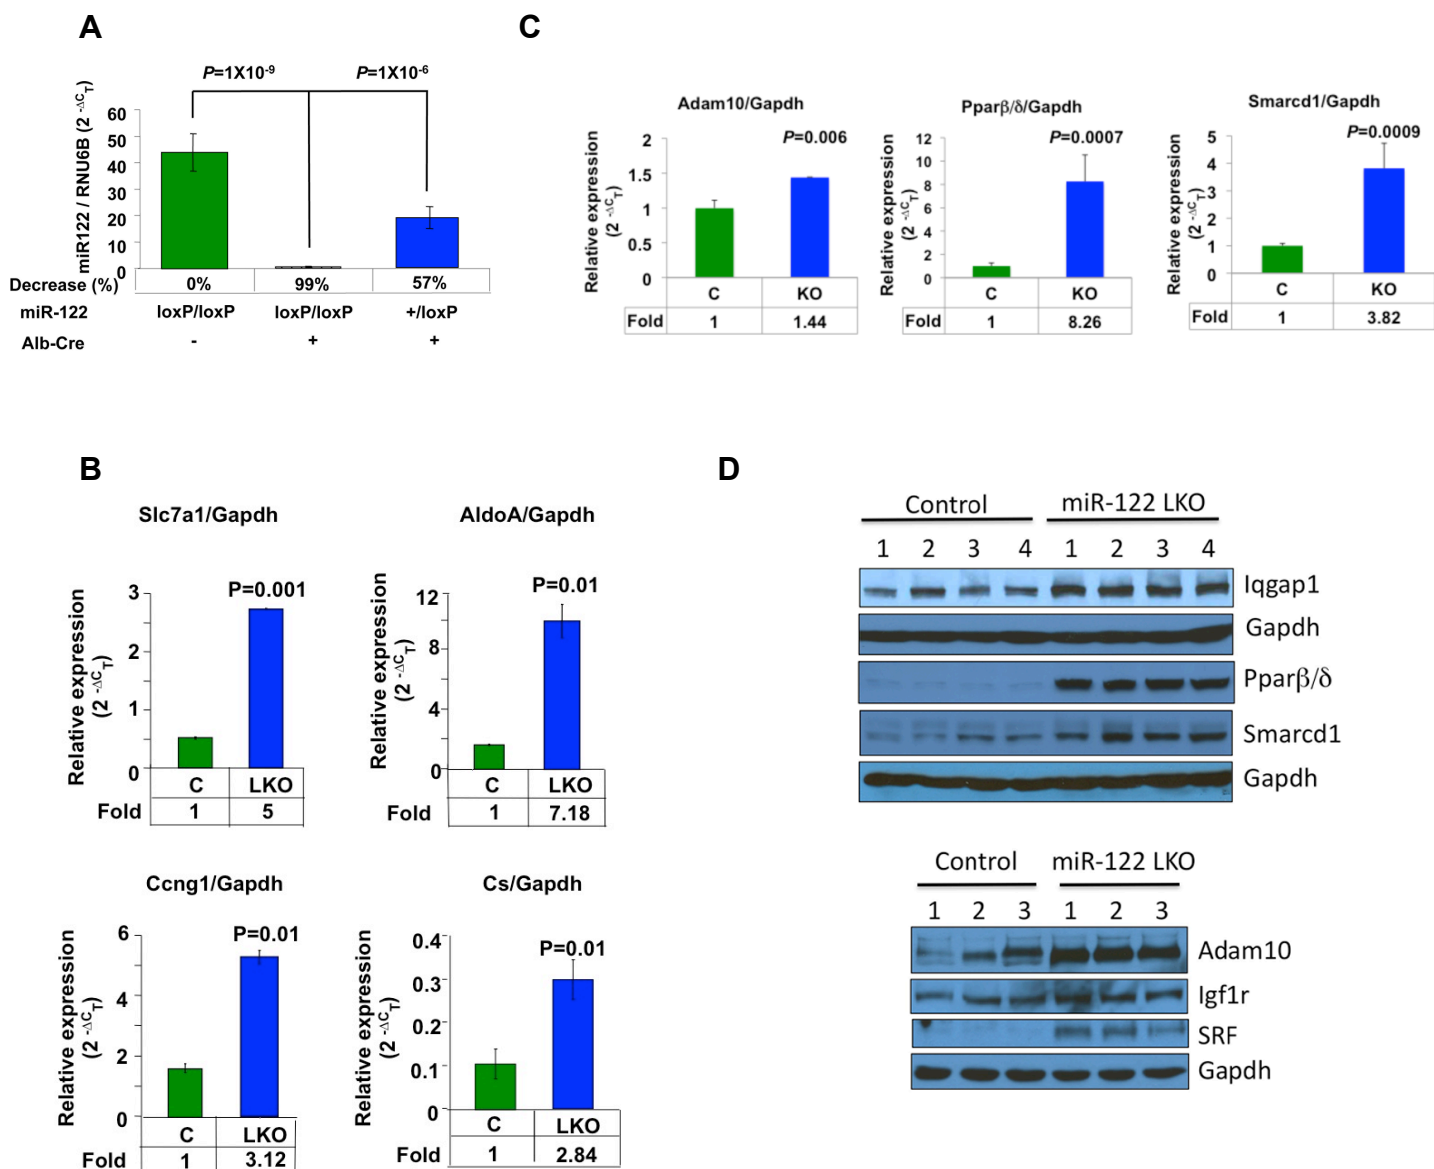

**Figure S2. (A) Quantitative PCR (qPCR) analysis of liver RNA from 10 week-old mice confirmed reduced miR-122 expression in heterozygous and homozygous LKO mice.** miR-122 and RNU6B were measured in DNase-treated total RNA using respective Taqman assay kits (Invitrogen). Each sample was analyzed in triplicate (n=4). **(B,C) qPCR analysis confirmed upregulation of validated miR-122 targets in LKO (B) and KO livers (C).** DNase-treated total RNA was subjected to qPCR using the SYBR Green method (n=4 mice per condition). Data was normalized to Gapdh. C, LKO, and KO denote control (floxed), liver-specific (LKO), and germline (KO) miR-122 knockout mice, respectively. **(D) Protein levels of validated miR-122 targets are increased in livers of 10 week-old miR-122 LKO mice.** Whole liver extracts prepared as described (1) were subjected to western blot analysis with specific antibodies.



### SUPPLEMENTAL FIGURE 3

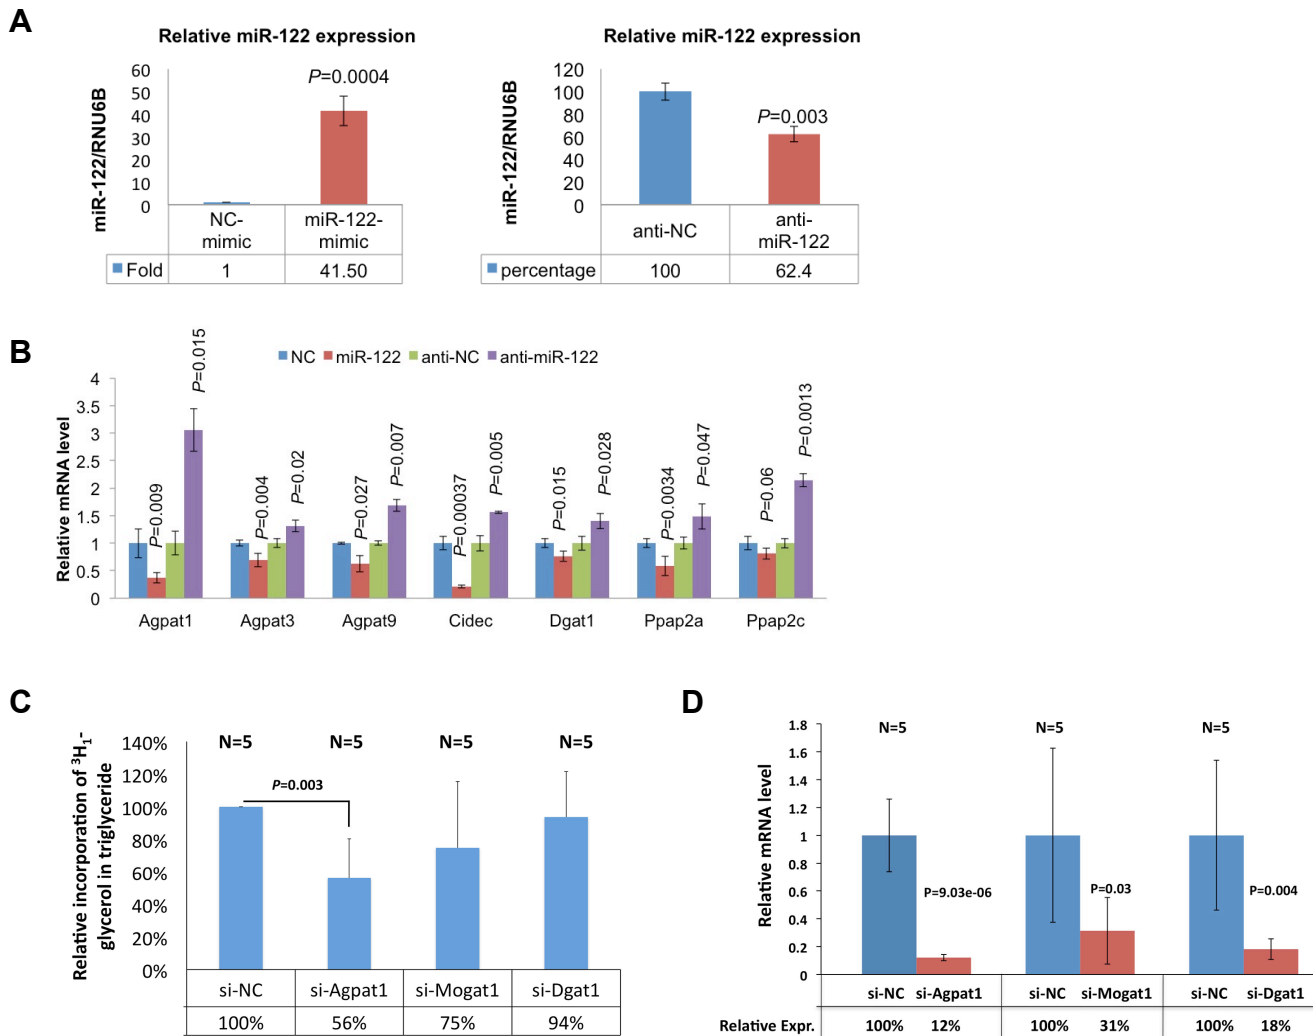

**Figure S3. miR-122 negatively regulates the expression of genes involved in triglyceride biosynthesis.** (A) miR-122 expression in mouse Hepa cells after transient transfection of miR-122 mimic or inhibitor. NC-mimic and anti-NC represent negative controls. (B) Relative expression of genes in the triglyceride biosynthesis pathway normalized to Gapdh expression 40-48 hours after transfection with miR-122 mimic or inhibitor. Expression in negative control-transfected cells was assigned a value of 1. The data represent the mean of 2 independent experiments  $\pm$  standard deviations (each sample analyzed in triplicate). Statistical analyses were performed using the 2-tailed t test. (C) Hepatocytes isolated from 3 LKO and 2 KO mice were transfected with 50nM gene-specific or scrambled siRNA for 6h. After 48h, cells were incubated with  $^3\text{H}_1$ -glycerol for 15 minutes and  $^3\text{H}_1$ -incorporation in purified TG was measured in  $5 \times 10^5$  cells. (D) qRT-PCR analysis demonstrating depletion of specific RNAs in hepatocytes transfected with gene-specific siRNAs. The data in panels (C) and (D) represent the mean  $\pm$  standard deviations (each sample analyzed in triplicate). Statistical analyses were performed using the 2-tailed t test.

# SUPPLEMENTAL FIGURE 4

**A**

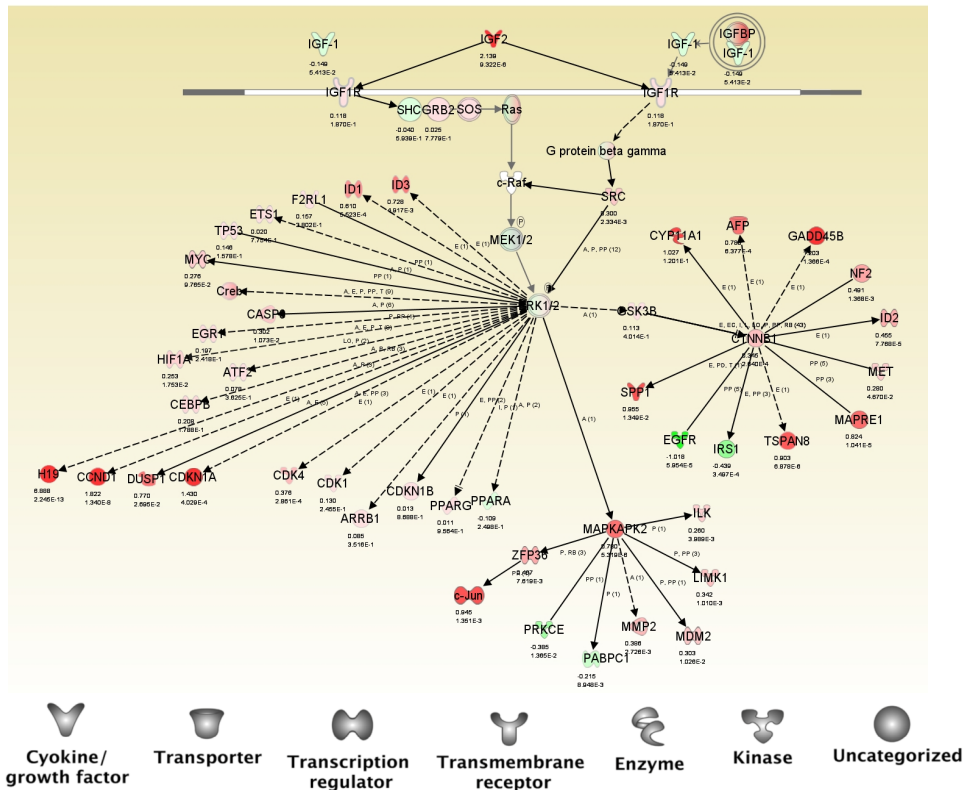

**B**

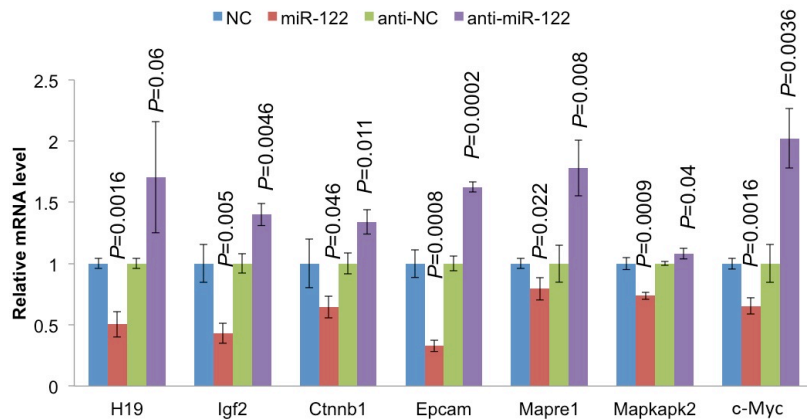

**Figure S4. (A) The IPA network of Igf2 signaling and downstream effectors including Ras and  $\beta$ -catenin (CTNNB1) is dysregulated in LKO livers.** The first number below each gene represents the fold change in expression ( $\log_2$ ) in LKO livers compared to controls while the second number represents the  $P$  value associated with the expression change. The shapes represent the functional class of each gene. **(B) miR-122 negatively regulates the expression of genes involved in hepatocarcinogenesis.** The experiment was performed as described in Figure S3B.

## SUPPLEMENTAL FIGURE 5

**A**

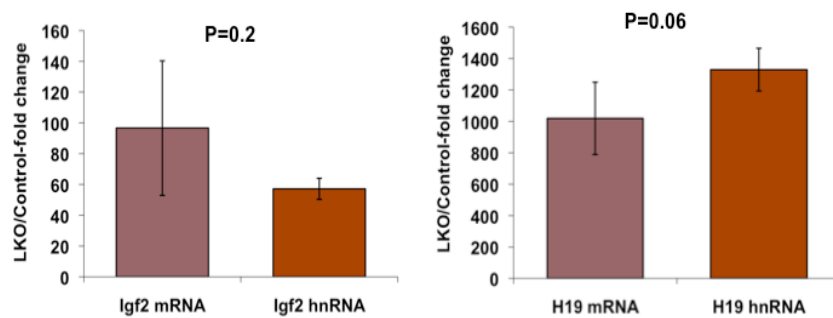

**B**

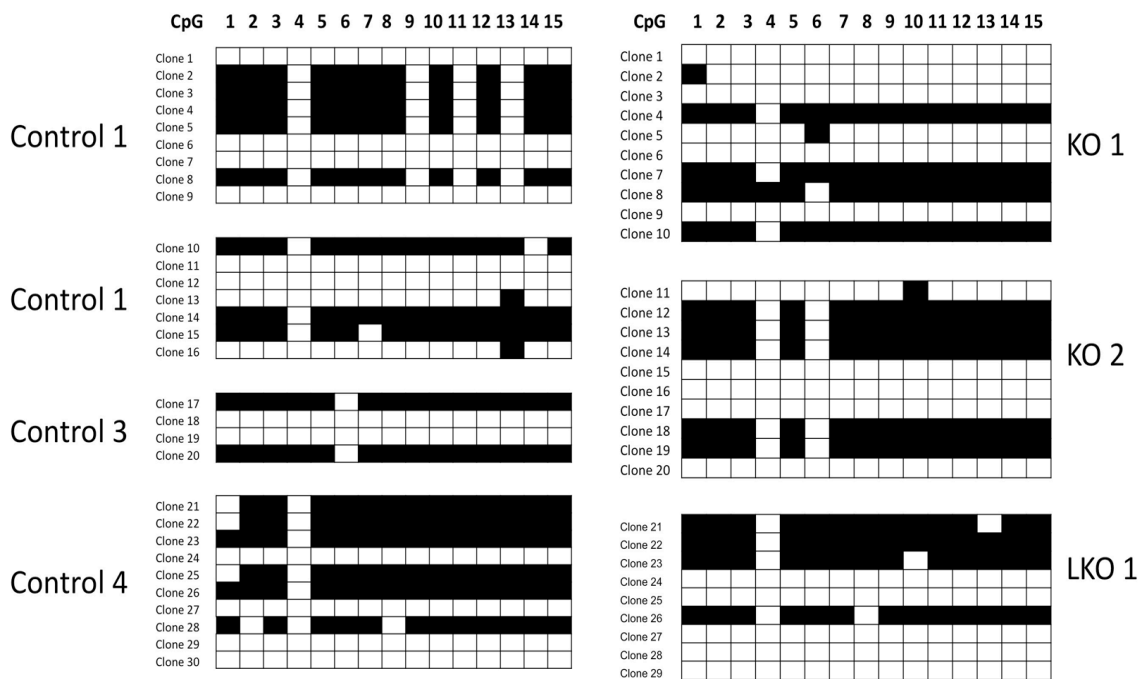

**Figure S5. (A) Ig2 and H19 are transcriptionally upregulated in miR-122 LKO livers.** a, qPCR analysis demonstrated comparable upregulation of Igf2 and H19 unspliced hnRNA and fully spliced mRNA in LKO livers. n=4. **(B) Methylation profile of DMR (Differentially Methylated Region) upstream of H19 gene is not significantly altered.** Genomic DNA from LKO/KO and control livers was subjected to bisulfite sequencing with DMR-specific primers (10). Black and white boxes represent methylated and unmethylated CpG respectively.

**SUPPLEMENTAL FIGURE 6**

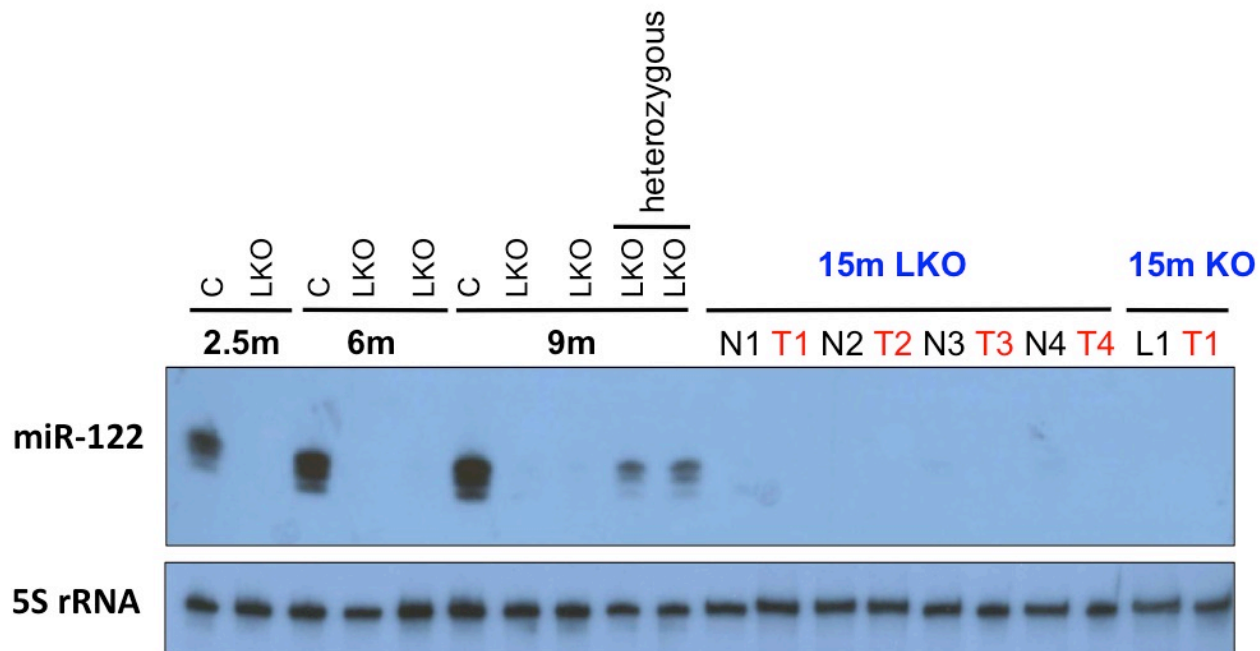

**Figure S6. miR-122 LKO livers do not undergo repopulation with non-recombined miR-122-expressing hepatocytes.** Northern blot analysis confirmed that expression of miR-122 is negligible in tumors (T) and matching benign liver tissues (N or L) in aged LKO mice. C, control mice.

## SUPPLEMENTAL FIGURE 7

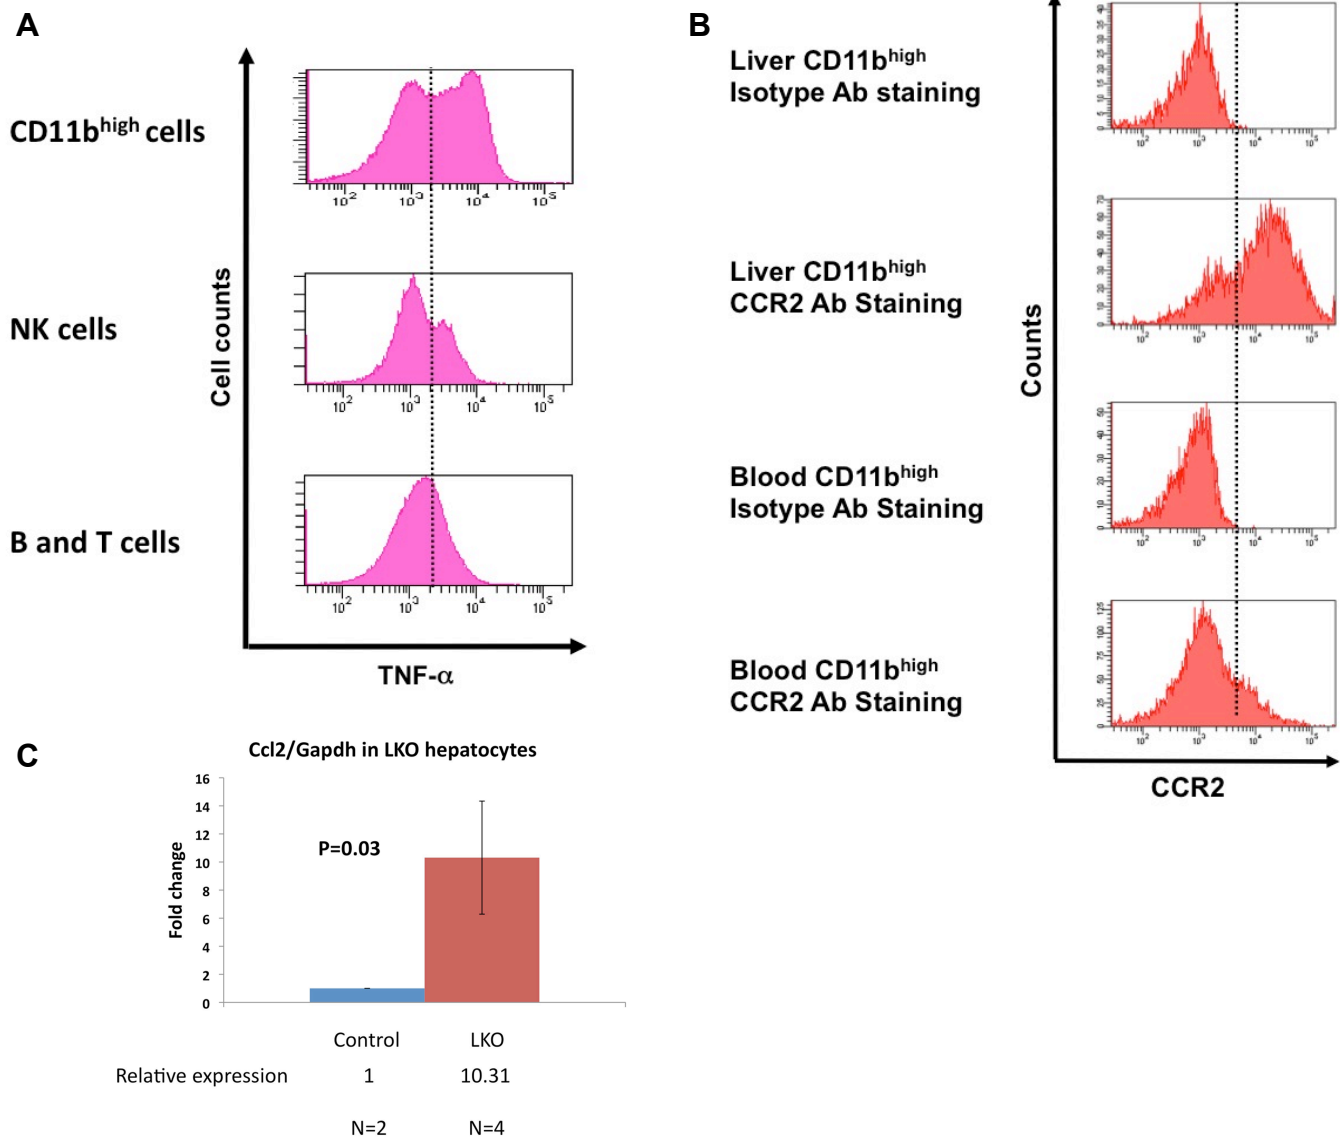

**Figure S7. (A) Liver CD11b<sup>high</sup>Gr1<sup>+</sup> cells produce TNF- $\alpha$ .** Liver immune cells were enriched by Percoll density gradient centrifugation and subjected to surface staining with Gr1, CD11b, CD3, CD19, and NK1.1 antibodies, followed by intracellular staining for TNF- $\alpha$ . **(B) The fraction of intrahepatic CD11b<sup>high</sup>Gr1<sup>+</sup> cells expressing Ccr2, the Ccl2 receptor, was much greater than the fraction of CD11b<sup>high</sup>Gr1<sup>+</sup> cells expressing Ccr2 in peripheral blood.** Liver immune cells were enriched by Percoll density gradient centrifugation and peripheral blood cells were collected after clearance by red blood cell lysis buffer. Both liver and blood immune cells were subjected to surface staining with Gr1, CD11b, CCR2, CD3, CD19, and NK1.1 antibodies. **(C) Ccl2 expression is increased in LKO hepatocytes.** Hepatocytes isolated from LKO and control (floxed) male mice were cultured overnight before RNA isolation. Ccl2 mRNA abundance was measured by qPCR and the data was normalized to Gapdh.

**SUPPLEMENTAL FIGURE 8**

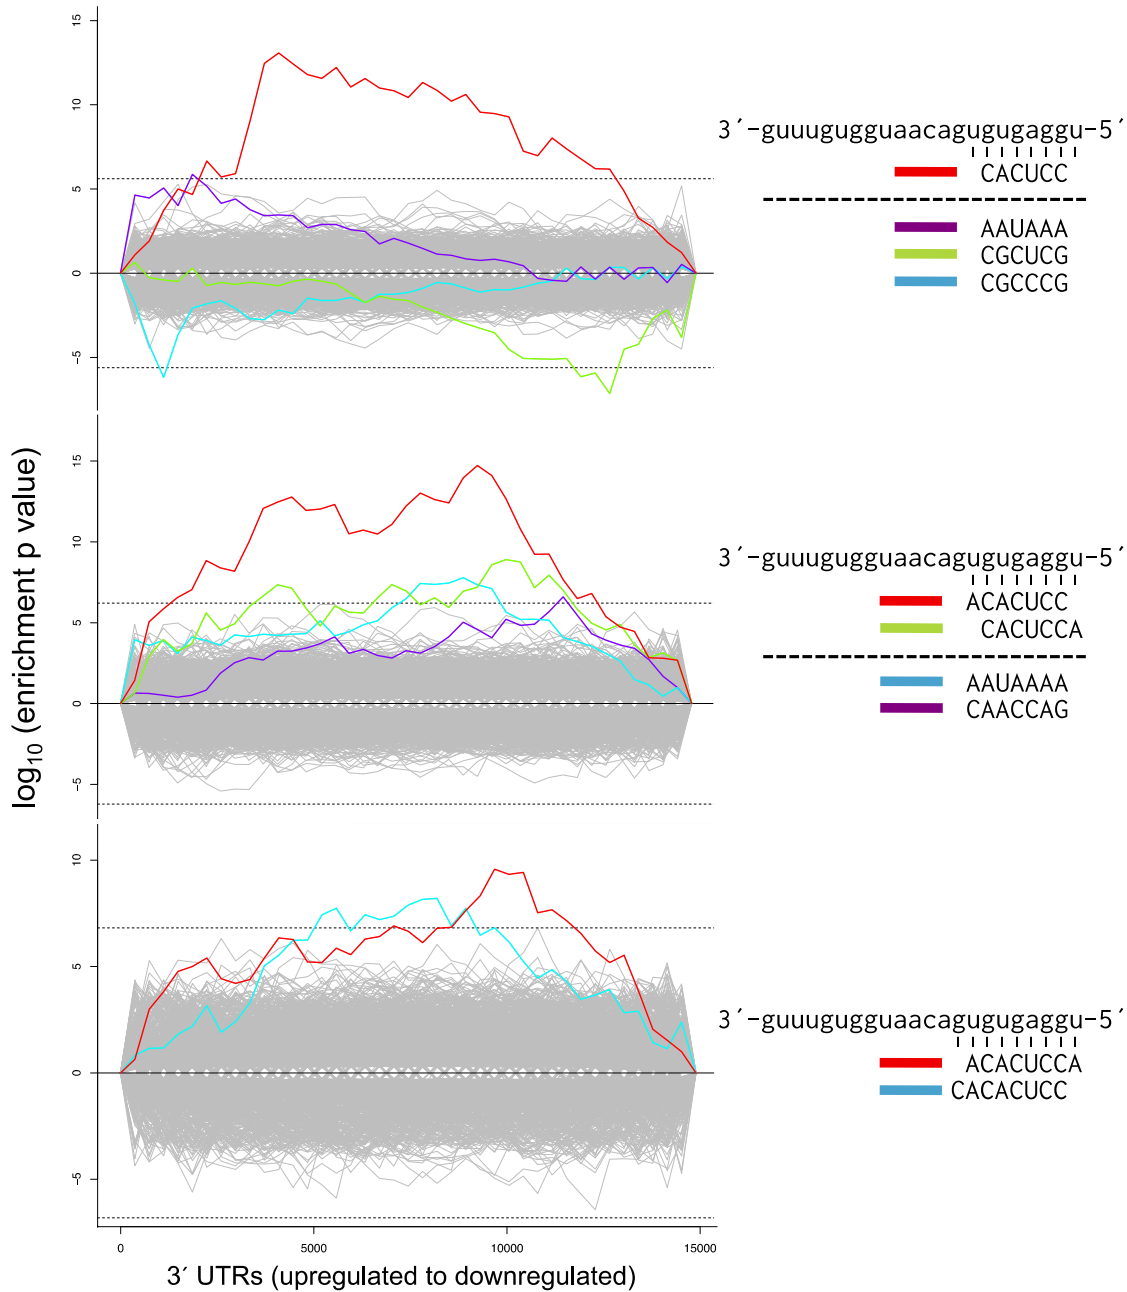

**Figure S8. Enrichment of miR-122 target sites in genes upregulated in tumors from KO/LKO mice.** Sylamer plots showing the enriched and depleted hexamers (upper), heptamers (middle), and octamers (lower) in transcripts that are upregulated in KO/LKO tumors. All motifs that reached statistical significance are highlighted in color on the plots. On the right, motifs that are complementary to the miR-122 seed sequence are shown above the dotted lines while those that are unrelated to miR-122 are shown below the dotted lines.

## SUPPLEMENTAL FIGURE 9

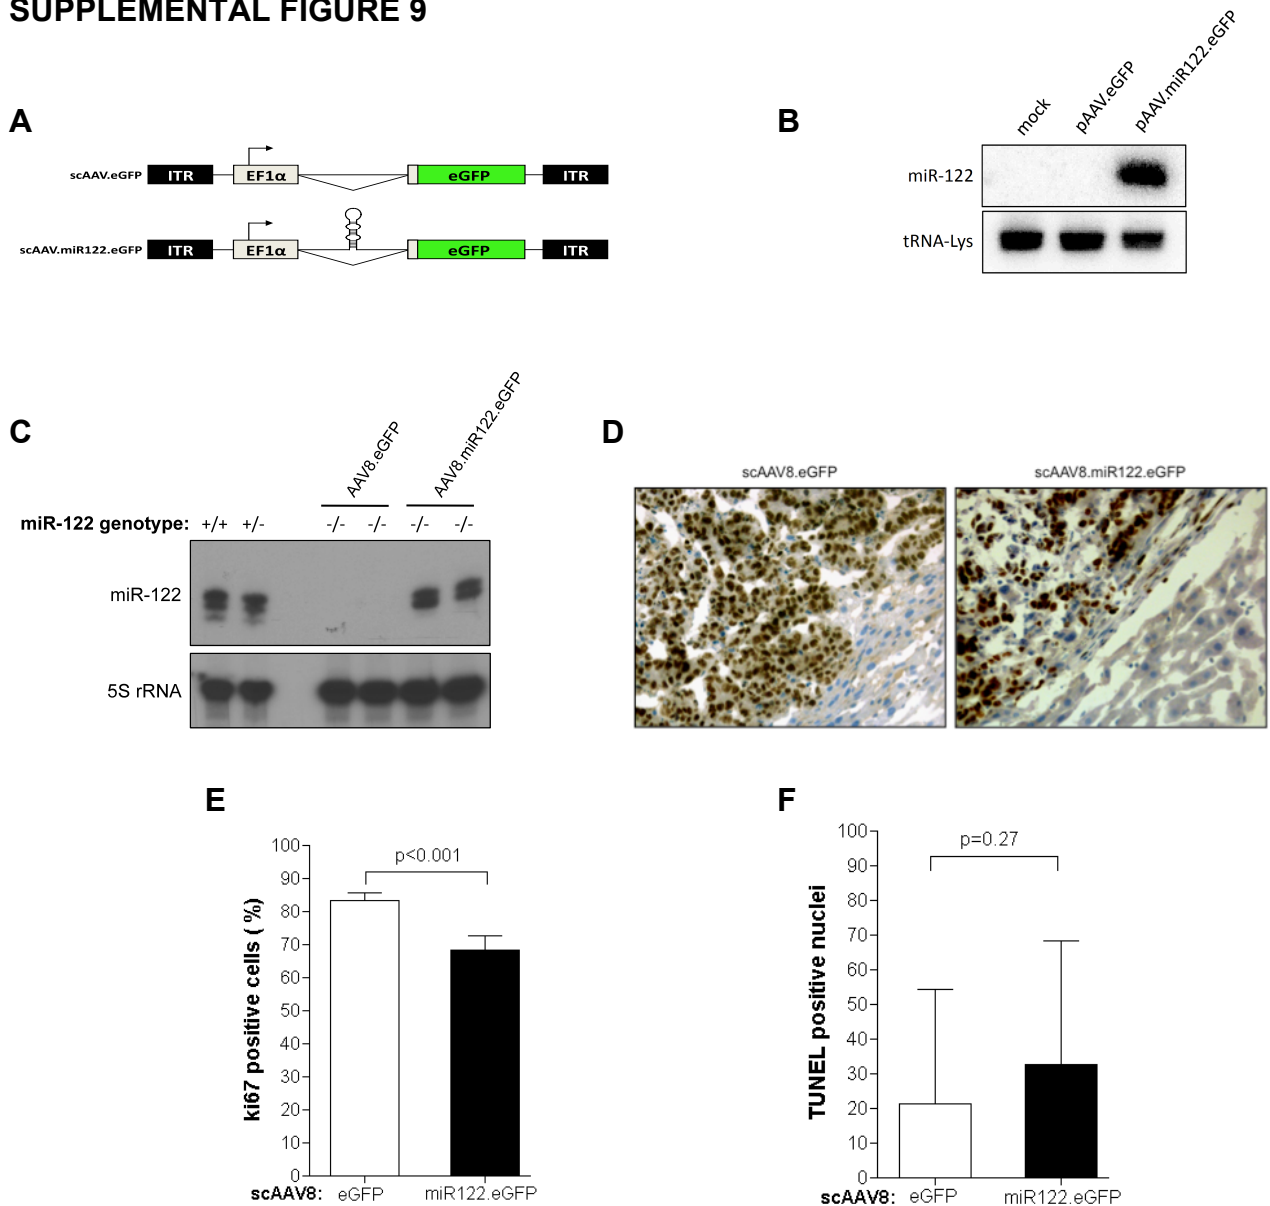

**Figure S9. Delivery of miR-122 suppresses tumorigenesis in tet-o-MYC; LAP-tTA mice.** (A) Schematic representation of scAAV.miR-122.eGFP vector illustrating locations of inverted terminal repeats (ITRs), elongation factor 1  $\alpha$  promoter (EF1 $\alpha$ ), miRNA (shown as a hairpin), and enhanced green fluorescent protein (eGFP) open reading frame. (B) Northern blot showing expression of miR-122 in HeLa cells after transfection of the indicated vectors. (C) Northern blot showing restitution of miR-122 expression in the liver after administration of scAAV8.miR122.eGFP to KO mice. (D) Representative ki67-stained sections from mice after administration of control (left) or miR-122-encoding (right) AAV vectors. The dashed lines show the boundary between normal liver (lower right) and tumor tissue (upper left). (E) Quantification of ki67 staining (n=6 mice per condition, 3-4 randomly chosen fields quantified per animal). (F) Quantification of TUNEL staining reveals no measurable difference in apoptosis in control vs. miR-122-treated tumors.

## SUPPLEMENTARY REFERENCES

1. Wang, B., Hsu, S.H., Majumder, S., Kutay, H., Huang, W., Jacob, S.T., and Ghoshal, K. 2010. TGFbeta-mediated upregulation of hepatic miR-181b promotes hepatocarcinogenesis by targeting TIMP3. *Oncogene* 29:1787-1797.
2. Shui, J.W., Hu, M.C., and Tan, T.H. 2007. Conditional knockout mice reveal an essential role of protein phosphatase 4 in thymocyte development and pre-T-cell receptor signaling. *Mol Cell Biol* 27:79-91.
3. Nagy, A., Rossant, J., Nagy, R., Abramow-Newerly, W., and Roder, J.C. 1993. Derivation of completely cell culture-derived mice from early-passage embryonic stem cells. *Proc Natl Acad Sci U S A* 90:8424-8428.
4. Adams, G.M., and Norton, S.J. 1971. Lipid metabolism. I. Effects of pressure and gas composition on acetate-C14 incorporation into liver lipids. *Aerosp Med* 42:146-148.
5. Ntambi, J.M., and Bene, H. 2001. Polyunsaturated fatty acid regulation of gene expression. *J Mol Neurosci* 16:273-278; discussion 279-284.
6. Wang, B., Hsu, S.H., Majumder, S., Kutay, H., Huang, W., Jacob, S.T., and Ghoshal, K. 2009. TGFbeta-mediated upregulation of hepatic miR-181b promotes hepatocarcinogenesis by targeting TIMP3. *Oncogene*.
7. Irizarry, R.A., Hobbs, B., Collin, F., Beazer-Barclay, Y.D., Antonellis, K.J., Scherf, U., and Speed, T.P. 2003. Exploration, normalization, and summaries of high density oligonucleotide array probe level data. *Biostatistics* 4:249-264.
8. Smyth, G.K. 2004. Linear models and empirical bayes methods for assessing differential expression in microarray experiments. *Stat Appl Genet Mol Biol* 3:Article3.
9. Gordon, D., Haynes, C., Yang, Y., Kramer, P.L., and Finch, S.J. 2007. Linear trend tests for case-control genetic association that incorporate random phenotype and genotype misclassification error. *Genet Epidemiol* 31:853-870.
10. Linhart, H.G., Troen, A., Bell, G.W., Cantu, E., Chao, W.H., Moran, E., Steine, E., He, T., and Jaenisch, R. 2009. Folate deficiency induces genomic uracil misincorporation and hypomethylation but does not increase DNA point mutations. *Gastroenterology* 136:227-235 e223.
